# Supplementary material for: A one-pot synthesis of water soluble highly fluorescent silica nanoparticles
Source: Royal Society of Chemistry journal article supplement (doi:10.1039/c6tb02813f), 2016-12-14
Supplement: c6tb02813f1.pdf [file c6tb02813f1.pdf]

## Supporting Information

### One pot synthesis of water soluble highly fluorescent silica nanoparticles

Sourov Chandra, Gregory Beaune, Naoto Shirahata, Francoise Winnik

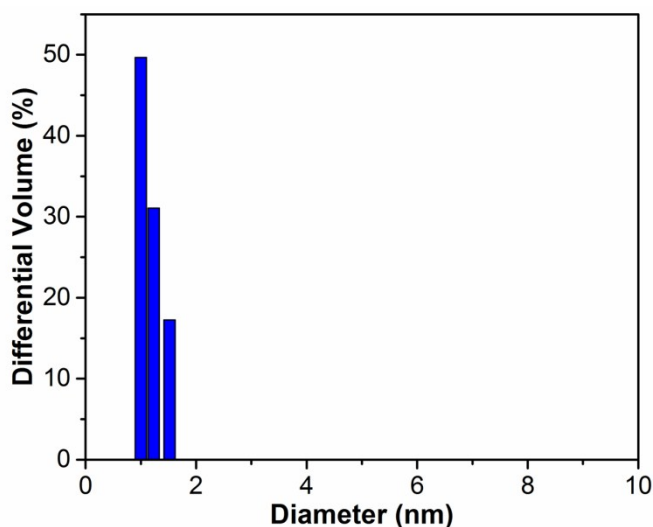

**Figure S1** Hydrodynamic size of the synthesized silica nanoparticles in water, determined by DLS.

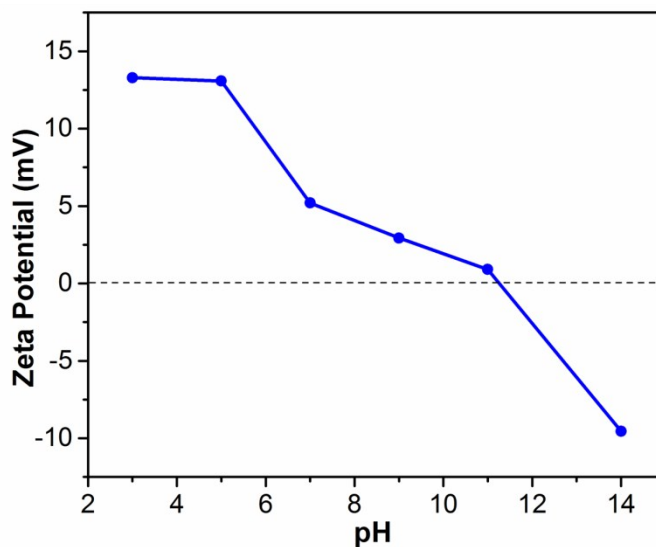

**Figure S2** Zeta Potential of the as synthesized silica nanoparticles in water.

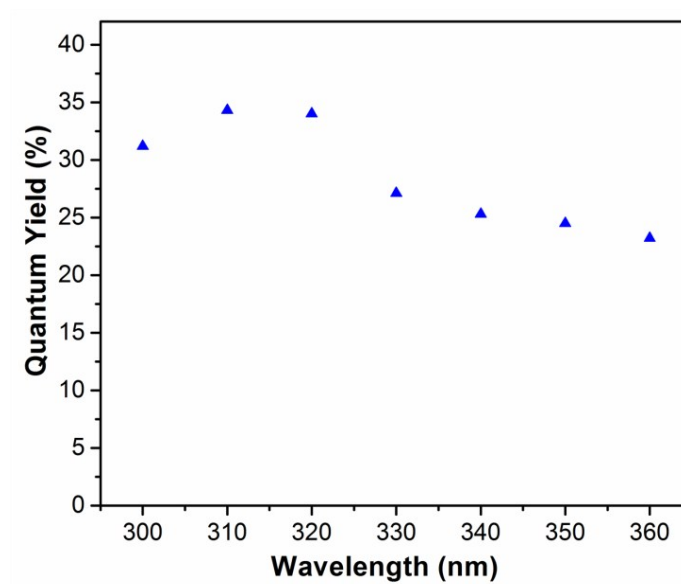

**Figure S3** Quantum yields of silica nanoparticles in water at different excitation wavelengths.

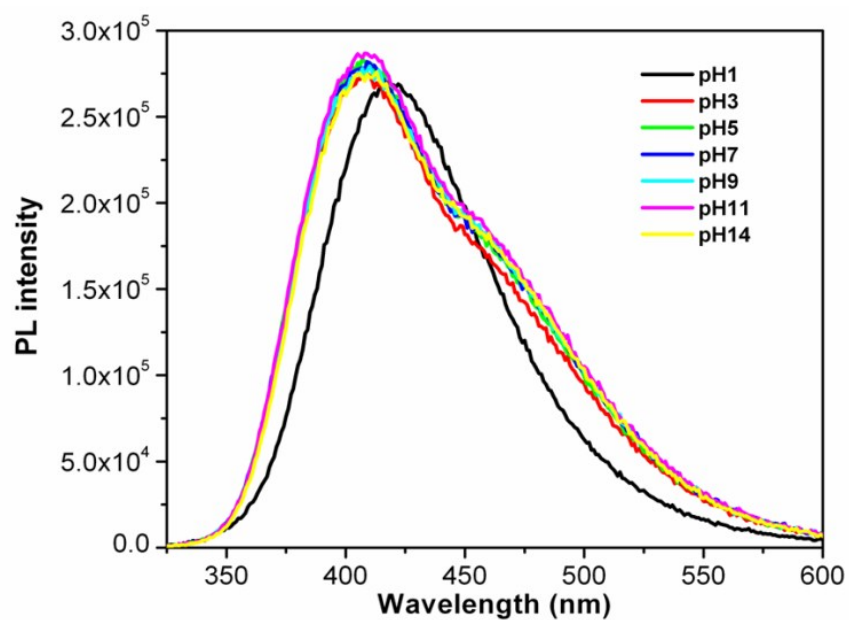

**Figure S4** pH dependent PL emissions of SiNP.

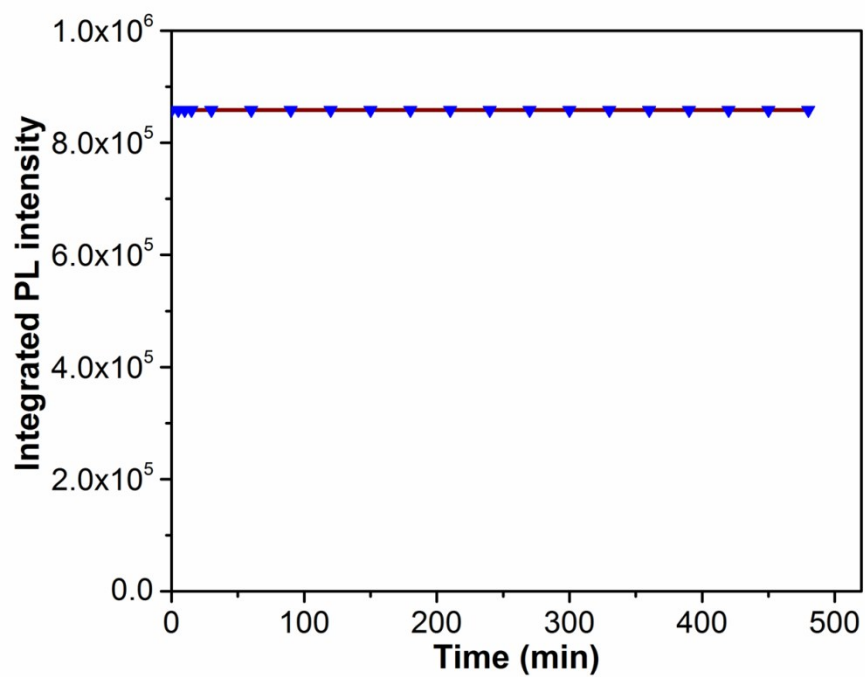

**Figure S5** Integrated PL intensity of SiNP under UV radiation against the time of UV exposure.

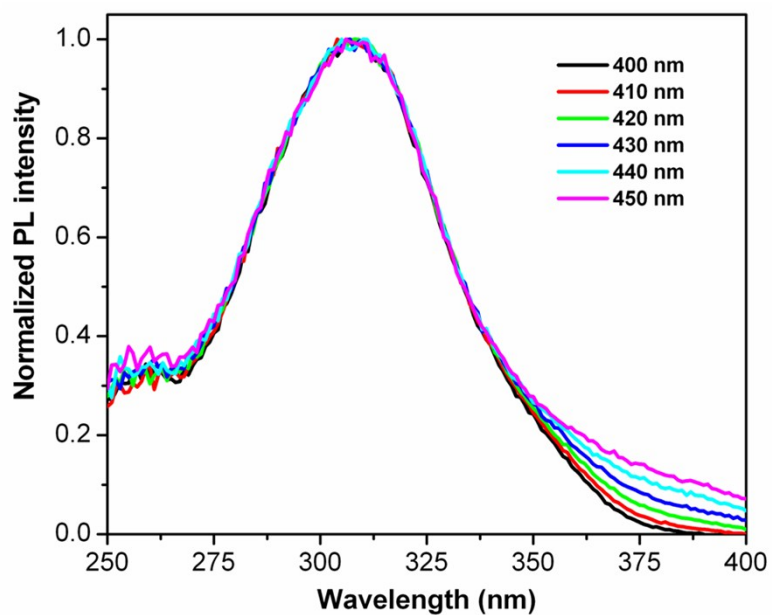

**Figure S6** Normalized PLE spectrum with variation of emission wavelength.
